# Supplementary material for: YY1 lactylation in microglia promotes angiogenesis through transcription activation-mediated upregulation of FGF2
Source: Research Square preprint supplement (doi:10.21203/rs.3.rs-910016/v1), 2021-09-24
Supplement: Supplementary file 1 [file f8e8d38a6f8f34bcbb339e51.docx]

Manuscript – NCOMMS-21-36911

The sequencing data can be found

<https://dataview.ncbi.nlm.nih.gov/object/PRJNA759047?reviewer=td7m88la5c784i862ru8d5aa24>

Accession number: PRJNA759047

The proteomic data can be found

<https://www.ebi.ac.uk/pride/login>

Reviewer account details:

Username: [reviewer_pxd028333@ebi.ac.uk](mailto:reviewer_pxd028333@ebi.ac.uk)

Password: P34dTqEI

The data are currently not available to the public. The authors have provided a secure token for Reviewer access only. Please keep this data confidential and access them for the sole purpose of reviewing this manuscript.
