# Supplementary material for: YY1 lactylation in microglia promotes angiogenesis through transcription activation-mediated upregulation of FGF2
Source: Research Square preprint supplement (doi:10.21203/rs.3.rs-910016/v1), 2021-09-24
Supplement: Supplementary file 1 [file f5480d3e85164082b029f086.pdf]

## Reporting Summary

Nature Portfolio wishes to improve the reproducibility of the work that we publish. This form provides structure for consistency and transparency in reporting. For further information on Nature Portfolio policies, see our [Editorial Policies](#) and the [Editorial Policy Checklist](#).

### Statistics

For all statistical analyses, confirm that the following items are present in the figure legend, table legend, main text, or Methods section.

n/a Confirmed

- The exact sample size ( $n$ ) for each experimental group/condition, given as a discrete number and unit of measurement
- A statement on whether measurements were taken from distinct samples or whether the same sample was measured repeatedly
- The statistical test(s) used AND whether they are one- or two-sided  
*Only common tests should be described solely by name; describe more complex techniques in the Methods section.*
- A description of all covariates tested
- A description of any assumptions or corrections, such as tests of normality and adjustment for multiple comparisons
- A full description of the statistical parameters including central tendency (e.g. means) or other basic estimates (e.g. regression coefficient) AND variation (e.g. standard deviation) or associated estimates of uncertainty (e.g. confidence intervals)
- For null hypothesis testing, the test statistic (e.g.  $F$ ,  $t$ ,  $r$ ) with confidence intervals, effect sizes, degrees of freedom and  $P$  value noted  
*Give  $P$  values as exact values whenever suitable.*
- For Bayesian analysis, information on the choice of priors and Markov chain Monte Carlo settings
- For hierarchical and complex designs, identification of the appropriate level for tests and full reporting of outcomes
- Estimates of effect sizes (e.g. Cohen's  $d$ , Pearson's  $r$ ), indicating how they were calculated

*Our web collection on [statistics for biologists](#) contains articles on many of the points above.*

### Software and code

Policy information about [availability of computer code](#)

Data collection ABI Prism 7500 system (Applied Biosystems, CA, United States); LSM 800 Carl (Zeiss, Germany); FV3000 (OLYMPUS, Japan); MaxQuant Search engine (v.1.6.6.0); Variostan LUX (Thermo Scientific, MA); TC20 (Bio-Rad, MA); Transfac database (<https://genexplain.com/transfac/>); Harmonizome (<https://maayanlab.cloud/Harmonizome/>); Cistrome Data Browser (<http://www.cistrome.org/>); JASPAR (<http://jaspar.genereg.net/>); Leica DMIL 4000 (Leica microsystem, Germany).

Data analysis CellSens Dimension software (OLYMPUS); image J (V1.8.0); GraphPad Prism (v8.3.0.538); The UniProt-GOA database (<http://www.ebi.ac.uk/GOA/>); InterProScan 5.52-86.0 (v86.0); The Kyoto Encyclopedia of Genes and Genomes (KEGG) database (<https://www.genome.jp/kegg/>); the STRING database (v 11.0); IBM SPSS Statistics 20 (v20.0).

For manuscripts utilizing custom algorithms or software that are central to the research but not yet described in published literature, software must be made available to editors and reviewers. We strongly encourage code deposition in a community repository (e.g. GitHub). See the Nature Portfolio [guidelines for submitting code & software](#) for further information.

### Data

Policy information about [availability of data](#)

All manuscripts must include a [data availability statement](#). This statement should provide the following information, where applicable:

- Accession codes, unique identifiers, or web links for publicly available datasets
- A description of any restrictions on data availability
- For clinical datasets or third party data, please ensure that the statement adheres to our [policy](#)

Any further data not included in the manuscript is available from the corresponding author on reasonable request. E-mail: [sphou828@163.com](mailto:sphou828@163.com).

## Field-specific reporting

Please select the one below that is the best fit for your research. If you are not sure, read the appropriate sections before making your selection.

Life sciences  Behavioural & social sciences  Ecological, evolutionary & environmental sciences

For a reference copy of the document with all sections, see [nature.com/documents/nr-reporting-summary-flat.pdf](https://www.nature.com/documents/nr-reporting-summary-flat.pdf)

## Life sciences study design

All studies must disclose on these points even when the disclosure is negative.

|                 |                                                                                                                                                                                                                             |
|-----------------|-----------------------------------------------------------------------------------------------------------------------------------------------------------------------------------------------------------------------------|
| Sample size     | No statistical method was used to predetermined sample size. All experiments were performed with a minimum of 3-6 biological replicates to perform statistical testing based on universal protocols with these experiments. |
| Data exclusions | No data was excluded from the manuscript.                                                                                                                                                                                   |
| Replication     | All experiments were performed at least three times. Replication numbers were shown in the figures as scatter plots with bar or in the Methods section.                                                                     |
| Randomization   | All mice were age-matched and randomized into control or treated groups. For cell culture experiments, individual wells were randomly assigned treatment conditions.                                                        |
| Blinding        | The proliferation, migration and tube formation assays were performed by X.T.W and scored by G.Q.W, W.Q.L and S.Y.H in a blinded manner.                                                                                    |

## Reporting for specific materials, systems and methods

We require information from authors about some types of materials, experimental systems and methods used in many studies. Here, indicate whether each material, system or method listed is relevant to your study. If you are not sure if a list item applies to your research, read the appropriate section before selecting a response.

### Materials & experimental systems

| n/a                                 | Involved in the study                                           |
|-------------------------------------|-----------------------------------------------------------------|
| <input type="checkbox"/>            | <input checked="" type="checkbox"/> Antibodies                  |
| <input type="checkbox"/>            | <input checked="" type="checkbox"/> Eukaryotic cell lines       |
| <input checked="" type="checkbox"/> | <input type="checkbox"/> Palaeontology and archaeology          |
| <input type="checkbox"/>            | <input checked="" type="checkbox"/> Animals and other organisms |
| <input type="checkbox"/>            | <input checked="" type="checkbox"/> Human research participants |
| <input checked="" type="checkbox"/> | <input type="checkbox"/> Clinical data                          |
| <input checked="" type="checkbox"/> | <input type="checkbox"/> Dual use research of concern           |

### Methods

| n/a                                 | Involved in the study                           |
|-------------------------------------|-------------------------------------------------|
| <input checked="" type="checkbox"/> | <input type="checkbox"/> ChIP-seq               |
| <input checked="" type="checkbox"/> | <input type="checkbox"/> Flow cytometry         |
| <input checked="" type="checkbox"/> | <input type="checkbox"/> MRI-based neuroimaging |

## Antibodies

### Antibodies used

Rabbit polyclonal Anti- $\beta$ -Actin, 1:5000, Proteintech, # 20536-1-AP  
 Mouse monoclonal Anti-CD31, 1:1000, Abcam, # ab9498  
 Rabbit polyclonal Anti-SIRT1, 1:1000, Abcam, # ab7343  
 Rabbit monoclonal Anti-Ki67, 1:250, Abcam, ab16667  
 Rabbit polyclonal Anti-PCAF, 1:1000, Abcam, # ab12188  
 Goat polyclonal Anti-Iba1, 1:1000, 1:1000, Abcam, # ab5076  
 VeriBlot for IP Detection Reagent (HRP), 1:500, Abcam, # 131366  
 Mouse monoclonal Anti-YY1, 1:500, Santa Cruz Biotechnology, # sc-28386  
 Mouse monoclonal Anti-HDAC6, 1:500, Santa Cruz Biotechnology, # sc-28386  
 Mouse monoclonal Anti-FGF2, 1:500, Santa Cruz Biotechnology, # sc-74412  
 Mouse monoclonal Anti-P300, 1:500, Santa Cruz Biotechnology, # sc-48343  
 Mouse monoclonal Anti-TIP60, 1:500, Santa Cruz Biotechnology, # sc-166323  
 Rabbit monoclonal Anti-Iba1, 1:1000, FUJIFILM Wako Shibayagi, # 019-19741  
 Rabbit Pan-Kla, 1:1000, PTM BIO, # PTM-1401  
 Alexa Fluor 488-labelled Goat Anti-Rabbit IgG(H+L), 1:500, Beyotime, # A0423  
 Alexa Fluor 488-labelled Goat Anti-Mouse IgG(H+L), 1:500, Beyotime, # A0428  
 Cy3-labelled Donkey Anti-Goat IgG(H+L), 1:500, Beyotime, # A0502  
 Cy3-labelled Goat Anti-Mouse IgG (H+L), 1:500, Beyotime, # A0521  
 Cy3-labelled Goat Anti-Rabbit IgG (H+L), 1:500, Beyotime, # A0516

|            |                                                                                                                                     |
|------------|-------------------------------------------------------------------------------------------------------------------------------------|
| Validation | All antibodies were purchased from commercial sources and were validated by vendors for use in Western Blot and immunofluorescence. |
|------------|-------------------------------------------------------------------------------------------------------------------------------------|

## Eukaryotic cell lines

Policy information about [cell lines](#)

|                                                                   |                                                                                                                                                                                                                   |
|-------------------------------------------------------------------|-------------------------------------------------------------------------------------------------------------------------------------------------------------------------------------------------------------------|
| Cell line source(s)                                               | HMC3 was purchased from ATCC; HRMEC was purchased from Cell Systems.                                                                                                                                              |
| Authentication                                                    | HMC3 and HRMEC cell lines are authenticated using STR profiling.                                                                                                                                                  |
| Mycoplasma contamination                                          | HMC3 and HRMEC cell lines were maintained under the recommended cultured conditions and media requirements. Mycoplasma contamination was performed in accordance with department protocols (and tested negative). |
| Commonly misidentified lines (See <a href="#">ICLAC</a> register) | None.                                                                                                                                                                                                             |

## Animals and other organisms

Policy information about [studies involving animals](#); [ARRIVE guidelines](#) recommended for reporting animal research

|                         |                                                                                                                                                                                                                                       |
|-------------------------|---------------------------------------------------------------------------------------------------------------------------------------------------------------------------------------------------------------------------------------|
| Laboratory animals      | C57BL/6J mice obtained from the Experimental Animal Center of Chongqing Medical University (Chongqing, China) were housed in a specific pathogen-free facility.                                                                       |
| Wild animals            | No wild animals were used in the study.                                                                                                                                                                                               |
| Field-collected samples | No field-collected samples were used in the study.                                                                                                                                                                                    |
| Ethics oversight        | All protocols were approved by the Ethics Committee of the First Affiliated Hospital of Chongqing Medical University (Number: 2019-101) and conformed to the ARVO Statement for the Use of Animals in Ophthalmic and Vision Research. |

Note that full information on the approval of the study protocol must also be provided in the manuscript.

## Human research participants

Policy information about [studies involving human research participants](#)

|                            |                                                                                                                                                                                                                                                                                                                                                                                                                                                                                                                                                                                                                                         |
|----------------------------|-----------------------------------------------------------------------------------------------------------------------------------------------------------------------------------------------------------------------------------------------------------------------------------------------------------------------------------------------------------------------------------------------------------------------------------------------------------------------------------------------------------------------------------------------------------------------------------------------------------------------------------------|
| Population characteristics | The clinical retrospective study included preterm infants (28~33 weeks of gestational age) who were admitted to the Children's Hospital of Chongqing Medical University between June 2019 and July 2021 (matching criteria: sex, age, weight, gestational age, birth weight, multiple birth, ethnic group). We excluded preterm infants who were suffering extremely serious diseases, such as multiple organ failure, cardiac arrest, septicemia and respiratory diseases that may directly influence the concentration of lactate in blood, such as neonatal respiratory distress syndrome, respiratory failure and severe pneumonia. |
| Recruitment                | The basic data (including sex, age, weight, gestational age, birth weight, multiple birth, ethnic group) were obtained from medical records. The levels of blood lactate were obtained from arterial blood gas analysis prior to commencing artificial ventilation treatment.                                                                                                                                                                                                                                                                                                                                                           |
| Ethics oversight           | All protocols were approved by the Ethics Committee of The Children's Hospital of Chongqing Medical University.                                                                                                                                                                                                                                                                                                                                                                                                                                                                                                                         |

Note that full information on the approval of the study protocol must also be provided in the manuscript.
